# Supplementary material for: Inappropriateness of Antibiotic Prescribing in Medical, Surgical and Intensive Care Units: Results of a Multicentre Observational Study
Source: MDPI journal article supplement (doi:10.3390/life11060475), 2021-05-24
Supplement: s1 [file s1]

Supplementary Materials

# Inappropriateness of Antibiotic Prescribing in Medical, Surgical and Intensive Care Units: Results of a Multicentre Observational Study

**Table S1.** The Units evaluated in Naples.

| Napoli Units                                     |                                         |                              |
|--------------------------------------------------|-----------------------------------------|------------------------------|
| Medical Units (10)                               | Surgical Units (16)                     | Intensive Care Units (3)     |
| Neurology                                        | Oncological Surgery of Digestive system | Intensive Care Unit          |
| Gastroenterology                                 | 4 <sup>th</sup> General Surgery         | Neonatal Intensive Care Unit |
| Rheumatology                                     | Thyroid Surgery                         | Intensive Care Unit number 2 |
| Infectious Diseases                              | General and Geriatric Surgery           |                              |
| Nephrology                                       | 9 <sup>th</sup> General Surgery         |                              |
| Psychiatry and Involuntary Psychiatric Treatment | Plastic Surgery                         |                              |
| Internal Medicine                                | Orthopedics                             |                              |
| Geriatrics                                       | Maxillo-Facial Surgery and Pedodontics  |                              |
| Endocrinology                                    | Pediatric Surgery                       |                              |
| Pediatrics and pediatric onco-hematology         | Gynecology and Obstetrics               |                              |
|                                                  | Otolaryngology                          |                              |
|                                                  | Urology                                 |                              |
|                                                  | Thoracic Surgery                        |                              |
|                                                  | 7 <sup>th</sup> General Surgery         |                              |
|                                                  | Digestive System Surgery                |                              |
|                                                  | 11 <sup>th</sup> General Surgery        |                              |

**Table S2.** The Units evaluated in Caserta.

| Caserta Units           |                                 |                                         |
|-------------------------|---------------------------------|-----------------------------------------|
| Medical Units (9)       | Surgical Units (9)              | Intensive Care Units (6)                |
| Geriatrics              | Orthopedics                     | Emergency Surgery and Trauma Centre     |
| Pediatrics              | Short hospitalization Surgery   | Neonatal Intensive Care Unit            |
| Onco-Hematology         | Urology                         | Coronary Intensive Care Unit            |
| Infectious Diseases     | General and Oncological Surgery | Emergency Medicine                      |
| Pneumology              | Otolaryngology                  | Intensive Care Unit after Heart Surgery |
| Internal Medicine       | Maxillo-Facial Surgery          | Anesthesia                              |
| Nephrology and Dialysis | Gynecology and Obstetrics       |                                         |
| Gastroenterology        | Vascular Surgery                |                                         |
| Neurology               | Heart Surgery                   |                                         |

**Table S3: Characteristics of units and antimicrobial prescription according to medical, surgical and intensive care units.**

| Variables                                             | Medical Units          | Surgical Units         | Intensive Care Units   |
|-------------------------------------------------------|------------------------|------------------------|------------------------|
| <i>Characteristics of Units</i>                       |                        |                        |                        |
| Units, N° (%)                                         | 19 (35.9)              | 25 (47.2)              | 9 (16.9)               |
| Beds available, N°                                    | 232                    | 269                    | 109                    |
| Patients assessed/Occupancy rate beds, N° (%)         | 210 (90.5)             | 187(69.5)              | 89 (81.7)              |
| Units in ASP, N° (%)                                  | 5 (26.3)               | 6 (24)                 | 4 (44.4)               |
| <i>Characteristics of antimicrobial prescriptions</i> |                        |                        |                        |
| <b>N° of Antimicrobial prescriptions</b>              | 65 (31%)               | 104 (55,6%)            | 39 (66,3%)             |
| Antibiotic prophylaxis N° (%)                         | 4 (6.2)                | 69 (66.3)              | 5 (12.8)               |
| Antimicrobial therapy N° (%)                          | 61 (93.8)              | 35 (33.7)              | 34 (87.2)              |
| <i>Prescriptive appropriateness</i>                   |                        |                        |                        |
| <b>N° of Antimicrobial prescriptions</b>              | 65                     | 104                    | 39                     |
| Inappropriate antimicrobial prescription N° (%)       | 35 (53.8) <sup>A</sup> | 83 (79.8) <sup>B</sup> | 25 (64.1) <sup>C</sup> |

Notes: A vs. B, p= 0.0003; A vs. C, p= 0.30; B vs. C, p = 0.052

**Table S4.** Prescription of the different antimicrobials according to medical, surgical and intensive care units.

| Variables                               | Medical Units | Surgical Units | Intensive Care Units | P value                                                        |
|-----------------------------------------|---------------|----------------|----------------------|----------------------------------------------------------------|
| <i>Antibiotics</i>                      |               |                |                      |                                                                |
| <b>N° of Antibiotics</b>                | 91            | 121            | 60                   |                                                                |
| Aminopenicillin, N° (%)                 | 12 (13.2)     | 37 (30.6)      | 8 (13.3)             | A vs b= <b>0.0029</b><br>A vs c=0.98<br>B vs c= <b>0.011</b>   |
| Piperacillin/tazobactam, N° (%)         | 13 (14.3)     | 7 (5.8)        | 11 (18.3)            | A vs b= <b>0.036</b><br>A vs c=0.50<br>B vs c= <b>0.008</b>    |
| Carbapenem, N° (%)                      | 2 (2.2)       | 4 (3.3)        | 7 (11.7)             | A vs b=0.70<br>A vs c= <b>0.03</b><br>B vs c= <b>0.043</b>     |
| First-generation cephalosporins, N° (%) | 0             | 28 (23.2)      | 2 (3.3)              | A vs b= <b>0.00001</b><br>A vs c=0.16<br>B vs c= <b>0.0005</b> |
| Third-generation cephalosporins, N° (%) | 20 (22)       | 13 (10.7)      | 5 (8.3)              | A vs b= <b>0.025</b><br>A vs c= <b>0.027</b><br>B vs c=0.61    |
| Macrolides, N° (%)                      | 4 (4.4)       | 1 (0.8)        | 2 (3.3)              | A vs b=0.17<br>A vs c=1<br>B vs c=0.25                         |
| Lincosamides, N° (%)                    | 0             | 2 (1.7)        | 0                    | A vs b=0.51<br>A vs c=1<br>B vs c=1                            |
| Aminoglycosides, N° (%)                 | 2 (2.2)       | 1 (0.8)        | 6 (10)               | A vs b=0.58<br>A vs c= <b>0.02</b><br>B vs c= <b>0.006</b>     |
| Quinolones, N° (%)                      | 13 (14.3)     | 13 (10.7)      | 4 (6.7)              | A vs b=0.44<br>A vs c=0.19<br>B vs c=0.43                      |
| Glycopeptides, N° (%)                   | 8 (8.8)       | 3 (2.5)        | 2 (3.3)              | A vs b= <b>0.06</b><br>A vs c=0.32<br>B vs c=1                 |

|                                     |           |            |           |                                                    |
|-------------------------------------|-----------|------------|-----------|----------------------------------------------------|
| Oxazolidinone, N° (%)               | 0         | 1 (0.8)    | 3 (5)     | A vs b=1<br>A vs c= <b>0.06</b><br>B vs c=0.11     |
| Cotrimoxazole, N° (%)               | 4 (4.4)   | 2 (1.7)    | 0         | A vs b=0.76<br>A vs c=0.15<br>B vs c=1             |
| Metronidazole, N° (%)               | 4 (4.4)   | 7 (5.8)    | 4 (6.7)   | A vs b=0.76<br>A vs c=0.71<br>B vs c=0.75          |
| Colistin, N° (%)                    | 0         | 0          | 2 (3.3)   | A vs b=1<br>A vs c=0.16<br>B vs c=0.11             |
| Lipopeptide, N° (%)                 | 1 (1.1)   | 0          | 0         | A vs b=0.43<br>A vs c=1<br>B vs c=1                |
| Tygecilin, N° (%)                   | 0         | 1 (0.8)    | 0         | A vs b=1<br>A vs c=1<br>B vs c=1                   |
| Azole, N° (%)                       | 2 (2.2)   | 1 (0.8)    | 3 (5)     | A vs b=0.58<br>A vs c=0.39<br>B vs c=0.11          |
| Echinocandin/Amphotericin B, N° (%) | 2 (2.2)   | 0          | 1 (1.7)   | A vs b=0.18<br>A vs c=1<br>B vs c=0.33             |
| Antituberculosis Agents, N° (%)     | 4 (4.4)   | 0          | 0         | A vs b= <b>0.03</b><br>A vs c=0.15<br>B vs c=1     |
| <i>Way of administration</i>        |           |            |           |                                                    |
| <b>N° of Antibiotics</b>            | 91        | 121        | 60        |                                                    |
| Oral, N° (%)                        | 19 (21.4) | 15 (12.5)  | 4 (6.3)   | A vs b=0.096<br>A vs c= <b>0.02</b><br>B vs c=0.31 |
| Intravenous, N° (%)                 | 72 (80.9) | 106 (88.3) | 56 (87.5) | A vs b=0.096<br>A vs c= <b>0.02</b><br>B vs c=0.31 |
